# Supplementary material for: Cervicovaginal microbiota and metabolome predict preterm birth risk in an ethnically diverse cohort
Source: JCI journal article supplement (doi:10.1172/jci.insight.149257), 2021-07-13
Supplement: sd1 [file 1]

## Supplementary Materials

1  
2  
3  
4  
5  
6  
7  
8  
9  
10  
11  
12  
13  
14  
15  
16  
17  
18  
19  
20  
21  
22  
23  
24

### **File includes:**

Figure S1: Flow and demographic of the subset of INSIGHT cohort participant used in this study

Figure S2: Exploration of BMI in relation to relation to term and preterm (<37 weeks) birth outcome and Ethnicity

Figure S3: Principal Component Analyses (PCoA) for the microbial composition of cervicovaginal fluid.

Figure S4: Heatmap representing species-level phylotypes relative abundance in each cervicovaginal fluid sample identified by 16s rRNA gene amplicon sequencing.

Figure S5: Volcano plot showing fold changes in cervicovaginal fluid metabolites.

Figure S6: Cervicovaginal fluid microbial composition based on principal component analyses (PCoA) groups in late pregnancy samples based on delivery outcome.

Figure S7: Cervicovaginal fluid microbial composition based on principal component analyses (PCoA) groups based on high-risk participant in relation to cervical length.

Figure S8: Cervicovaginal microbial distribution based on principal component analyses (PCoA) groups in relation to self-reported ethnicity and pregnancy outcome.

Figure S9: Alpha diversity analyses at OTU level of species richness within cervicovaginal fluid

Figure S10: Venn Diagram of cervicovaginal fluid OTUs composition

Figure S11: Spearman Correlation analyses of cervicovaginal fluid OTUs, metabolites and host response proteins in late samples (16-23<sup>+6</sup> weeks gestation).

Figure S12: Spearman Correlation analyses of cervicovaginal fluid from whole cohort to include pH

Table S1: Participant demographics

Table S2: Exploration of cervicovaginal fluid (CVF) components

25 Table S3: Orthogonal Projections to Latent Structures – Discriminant Analysis (OPLS-DA) of  
26 cervicovaginal fluid metabolites differences

27 Table S4: LDA (Linear Discriminant Analysis) Effect Size (LEfSe) of cervicovaginal fluid OTUs in relation to  
28 term and preterm (<37 weeks) birth

29 Table S5: LDA (Linear Discriminant Analysis) Effect Size (LEfSe) of cervicovaginal fluid OTUs in relation to  
30 term and preterm (<34 weeks) birth

31 Table S6: Composite metabolite prediction model for spontaneous preterm birth <37 weeks

32 Table S7: Logistic regression of significant cervicovaginal three metabolites (standardized) to predict  
33 spontaneous preterm birth <34 weeks (sPTB34)

34 Table S8: Stepwise logistic regression model of phylotypes

35 Table S9: Logistic regression metabolites and phylotypes for spontaneous preterm birth <34 weeks  
36 (sPTB34)

37 Table S10: Characterization of the 16S microbiome based on species-level composition by samples  
38

39

40

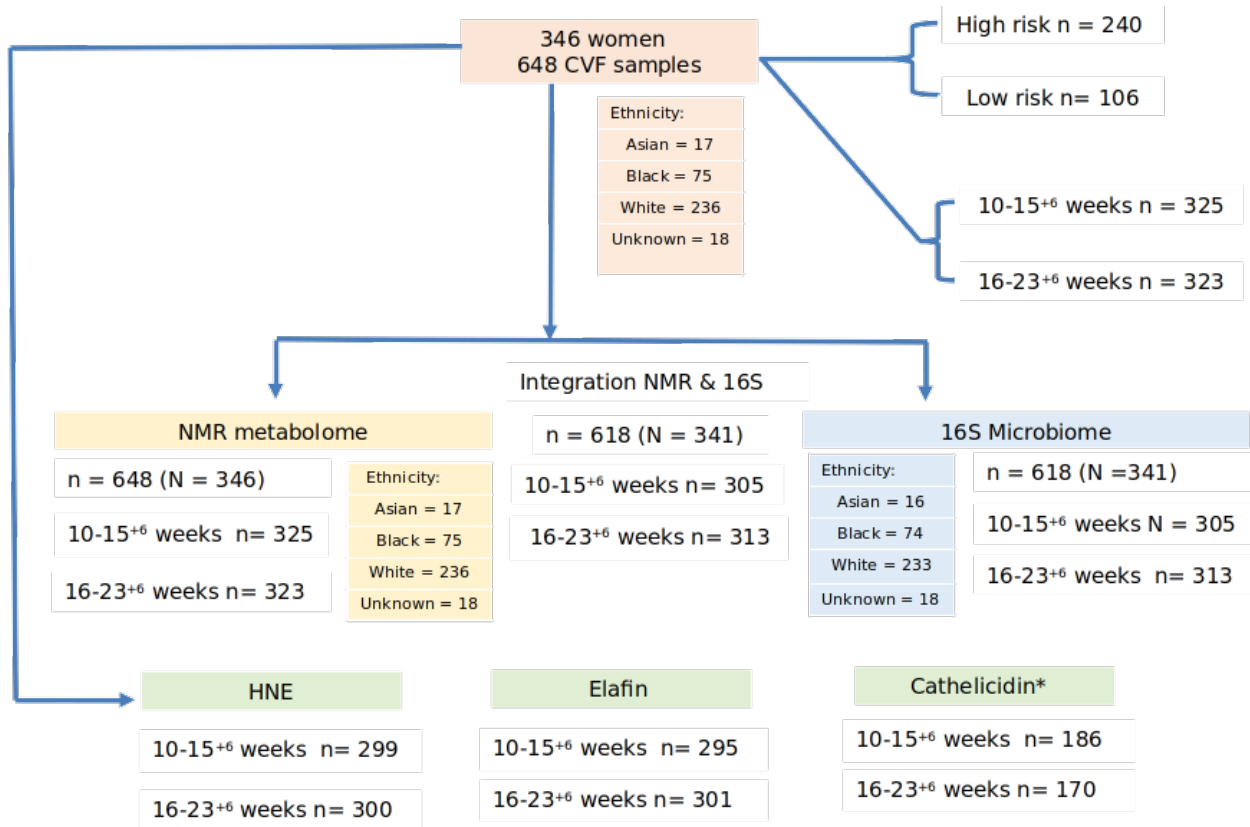

41  
42

43 **Figure S1: Flow and demographic of the subset of INSIGHT cohort participant used in this study.** Data  
 44 show information for women providing at least one cervicovaginal fluid sample independent of the time  
 45 point. Asian and unknown ethnic groups are combined for reporting some of the analyses as ‘other’. NMR:  
 46 Nuclear Magnetic Resonance. CVF: cervicovaginal fluid. 16S microbiome: 16S rRNA amplicon sequencing.  
 47 N: number of patients; n: number of samples. HNE: Human Neutrophil elastase. (\*) indicate that  
 48 Cathelicidin samples were collected only for high- risk women.

49

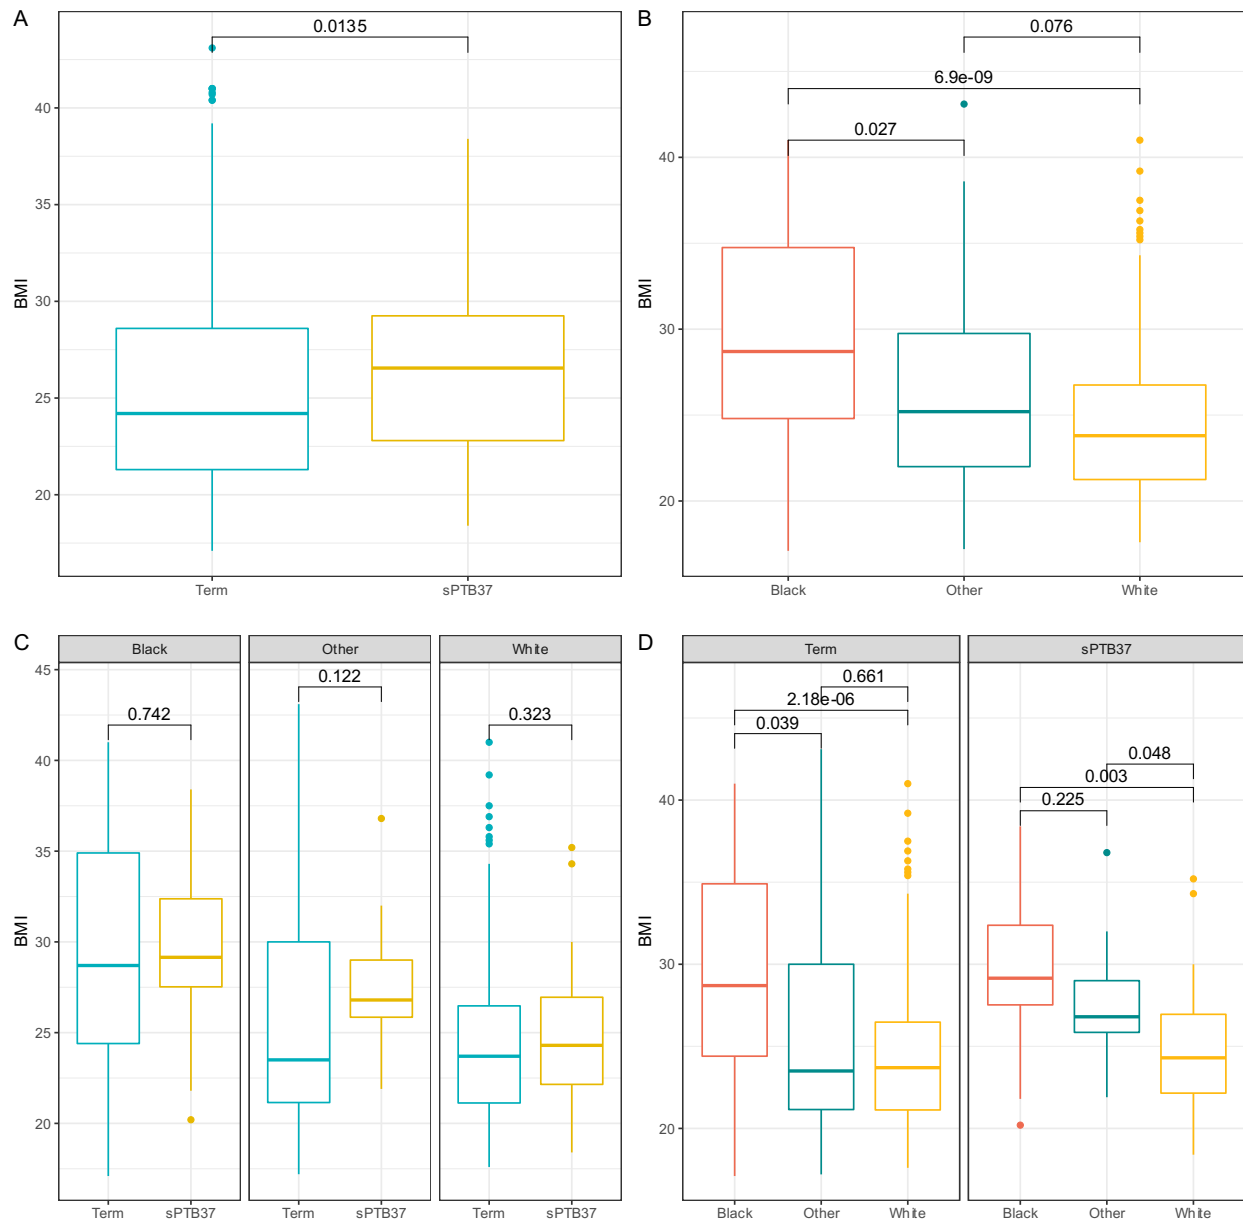

50  
 51 **Figure S2: Exploration of BMI in relation to relation to term and preterm (<37 weeks) birth outcome**  
 52 **and Ethnicity.** BMI measured at study entry (N= 345) in relation to (a) pregnancy outcome before 37  
 53 weeks' gestation (sPTB37) and (b) to self-reported ethnicity. (c) BMI comparison with pregnancy outcome  
 54 segregated by self-reported ethnicity and (d) BMI comparison with self-reported ethnicity segregated by  
 55 pregnancy outcome. Wilcoxon test with p-value adjusted using false discovery rate (FDR).  
 56

57

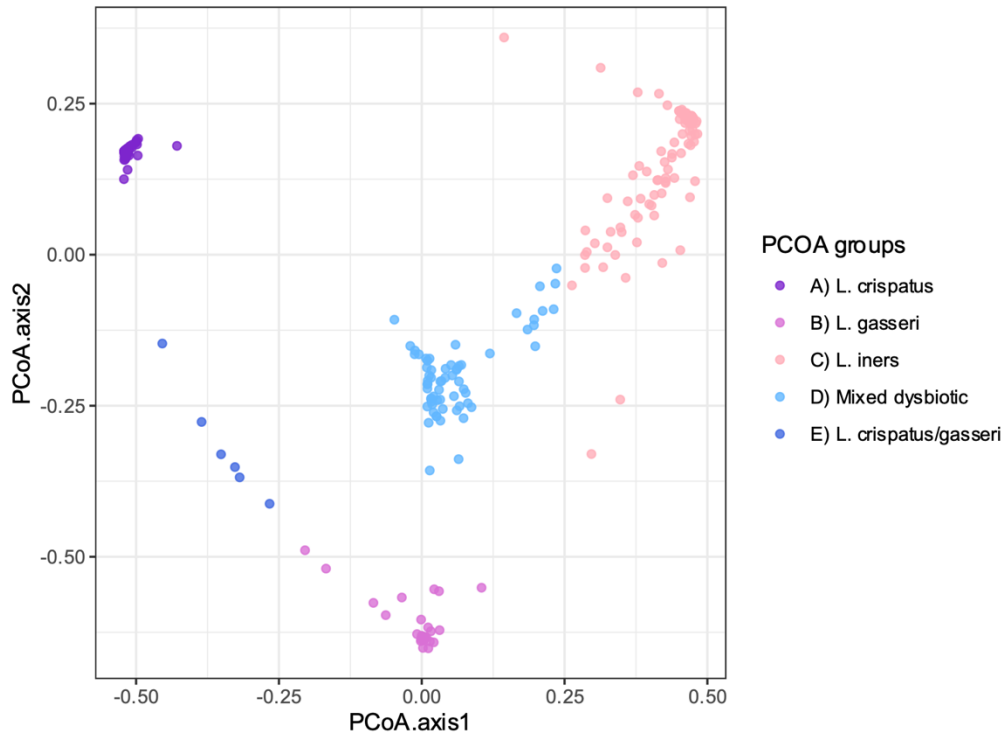

58  
 59  
 60  
 61  
 62

**Figure S3: Principal Component Analyses (PCoA) for the microbial composition of cervicovaginal fluid.** Groups distribution in the whole community in early pregnancy samples collected between 10-15<sup>+6</sup> weeks gestation.

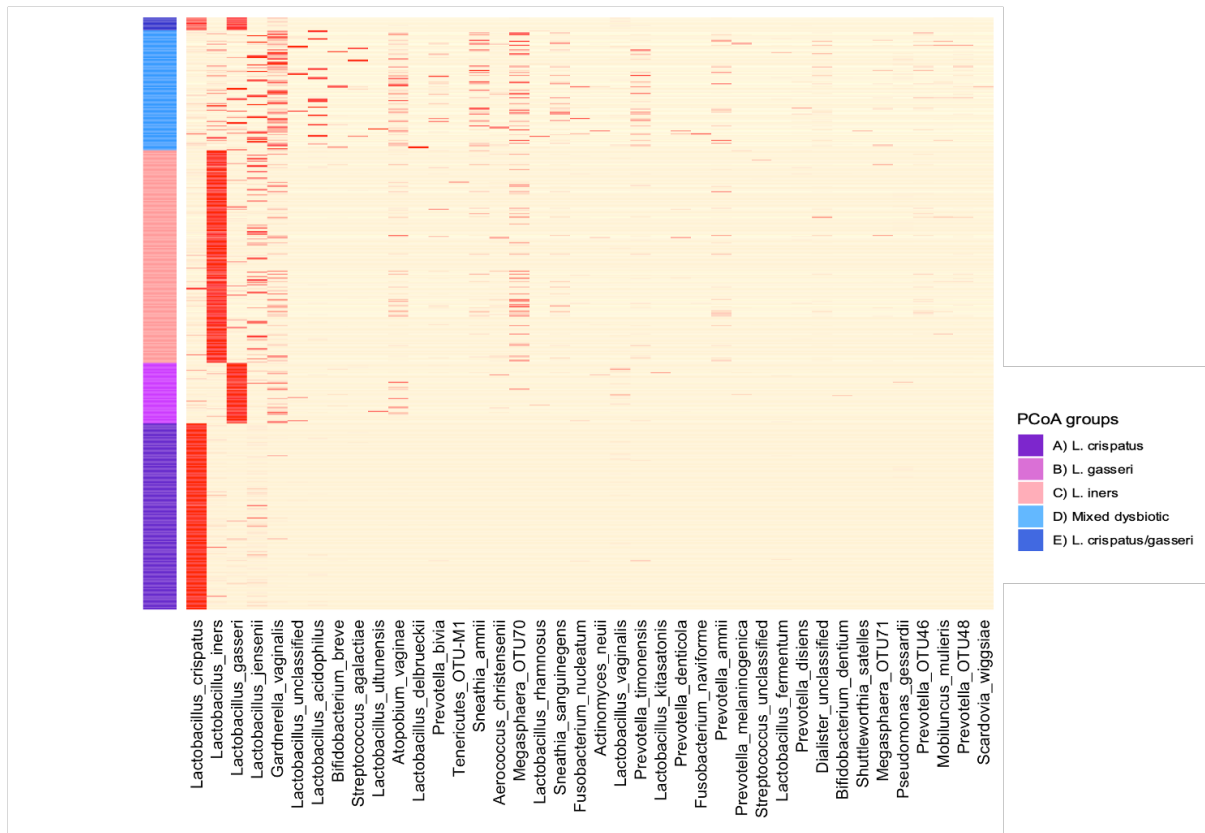

63  
 64 **Figure S4: Heatmap representing species-level phylotypes relative abundance in each cervicovaginal**  
 65 **fluid sample identified by 16s rRNA gene amplicon sequencing.** Samples are represented on the vertical  
 66 axis and phylotypes on the horizontal axis. Color scale goes from red (highest abundance) to pale yellow  
 67 (absence). The colored bar on the left side identifies the samples belonging to each principal component  
 68 analyses (PCoA) group.

69  
 70  
 71

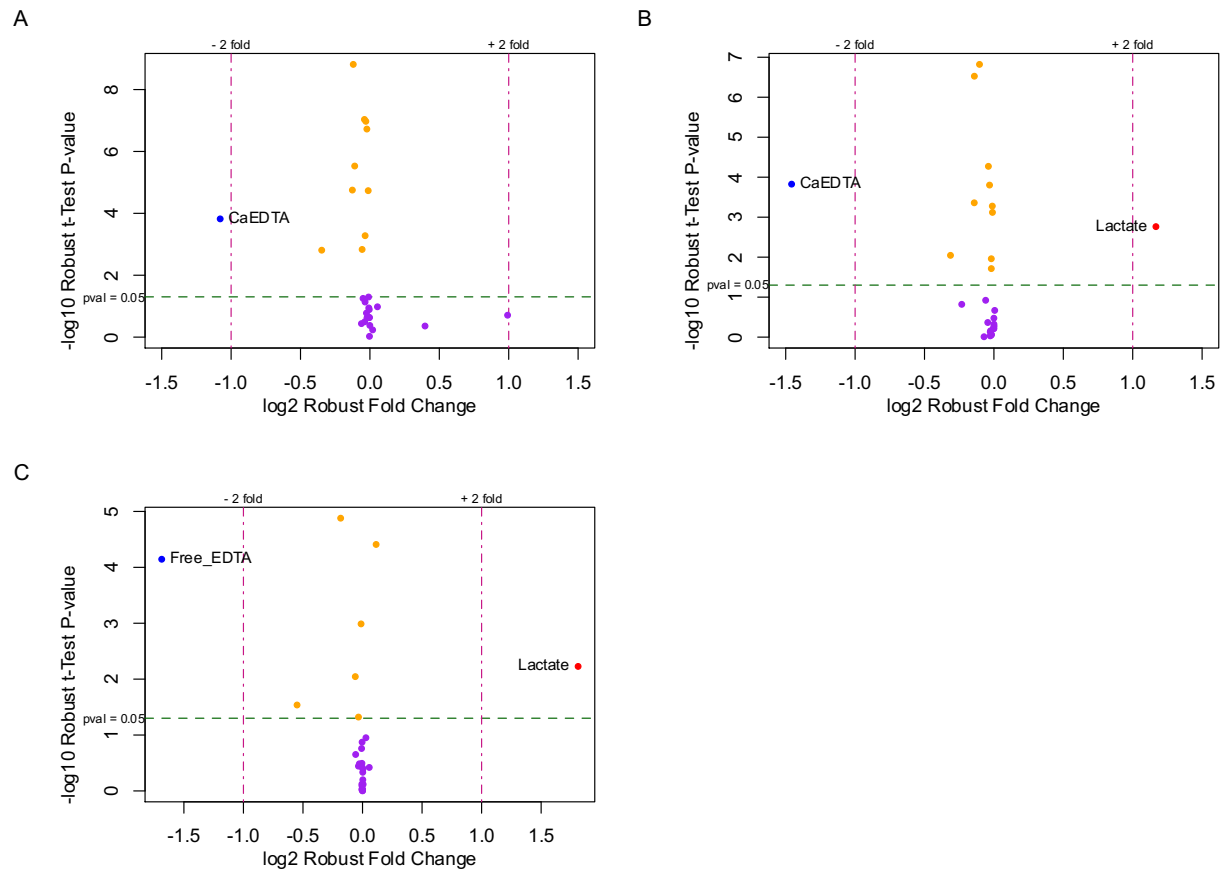

72

73 **Figure S5: Volcano plot showing fold changes in cervicovaginal fluid metabolites.** (A-B) Ethnicity  
 74 comparison for White and Black women in early (A) and late (B) cervicovaginal fluid samples (baseline  
 75 white women). Early samples comprised of N=72 Black and N=219 White women. Late samples  
 76 characterized by N=70 Black and N=222 White women. (C) Comparison between low risk (N= 94) and high-  
 77 risk (N=198) women in the late samples for Black and White women (baseline low-risk women).

78

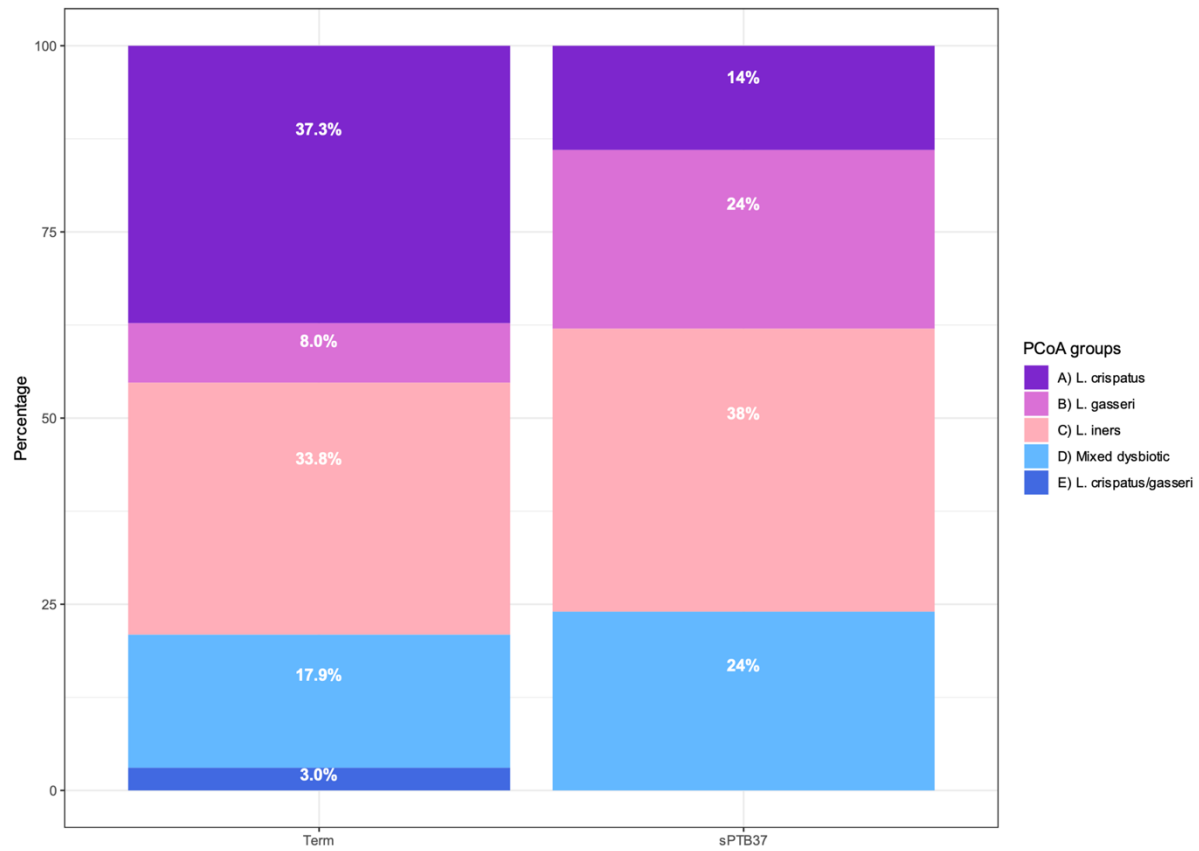

79  
 80 **Figure S6: Cervicovaginal fluid microbial composition based on principal component analyses (PCoA)**  
 81 **groups in late pregnancy samples based on delivery outcome.** Distribution of PCoA groups in the late  
 82 samples (16-23<sup>+6</sup> weeks gestation) in the whole community based on delivery outcome for term and  
 83 spontaneous preterm (sPTB <37 weeks) birth.

84

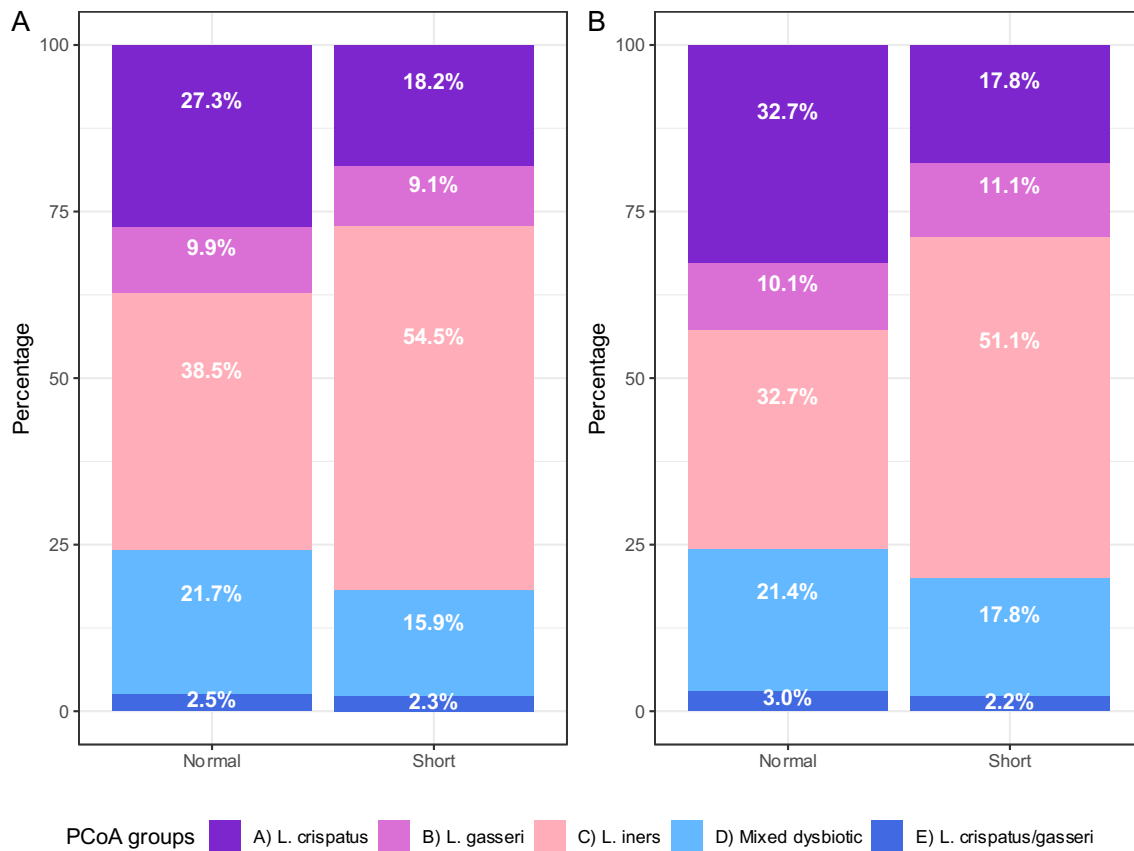

85

86

87 **Figure S7: Cervicovaginal fluid microbial composition based on principal component analyses (PCoA)**

88 **groups based on high-risk participant in relation to cervical length.** High-risk women stratified into two

89 groups, those who have a normal cervical length measured by transvaginal ultrasound versus women who

90 develop a short cervix (<25 mm) by 24 weeks of gestation. A) early samples (10-15<sup>+</sup>6 weeks gestation) and

91 B) late samples (16-23<sup>+</sup>6 weeks gestation). Early samples high-risk N=220 of which 45 develop a short

92 cervix; late samples high-risk N= 219 of which 45 develop a short cervix.

93

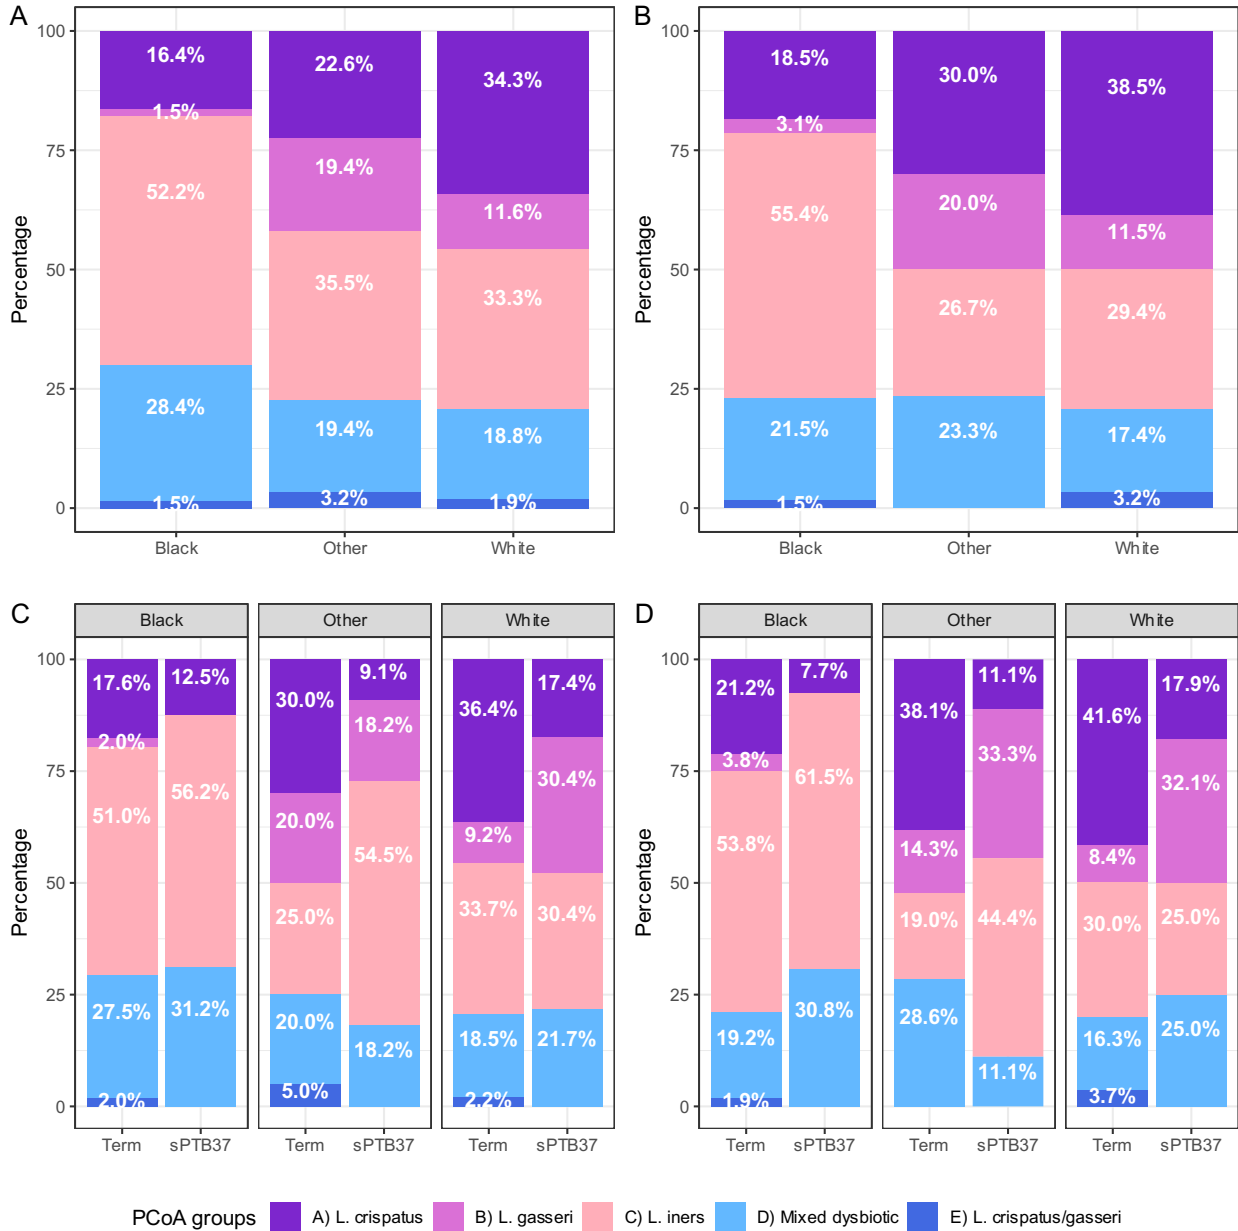

95  
96  
97  
98  
99  
100  
101  
102  
  
103  
104

**Figure S8: Cervicovaginal microbial distribution based on principal component analyses (PCoA) groups in relation to self-reported ethnicity and pregnancy outcome.** PCoA groups are shown in relation to ethnicity in (A) early (10-15<sup>+6</sup> weeks gestation) and (B) late (16-24<sup>+6</sup> weeks gestation) samples. (C) Distribution of PCoA groups based on ethnicity and term outcome in early samples compared to late samples (D). sPTB37: spontaneous preterm birth <37 weeks' gestation. Early samples comprise of: Black N=67 (16 sPTB37); White N=207 (23 sPTB37); Other N=31 (11 sPTB37). Late samples comprise of: Black N=65 (13 sPTB37); White N=218 (28 sPTB37); Other N=30 (9 sPTB37)

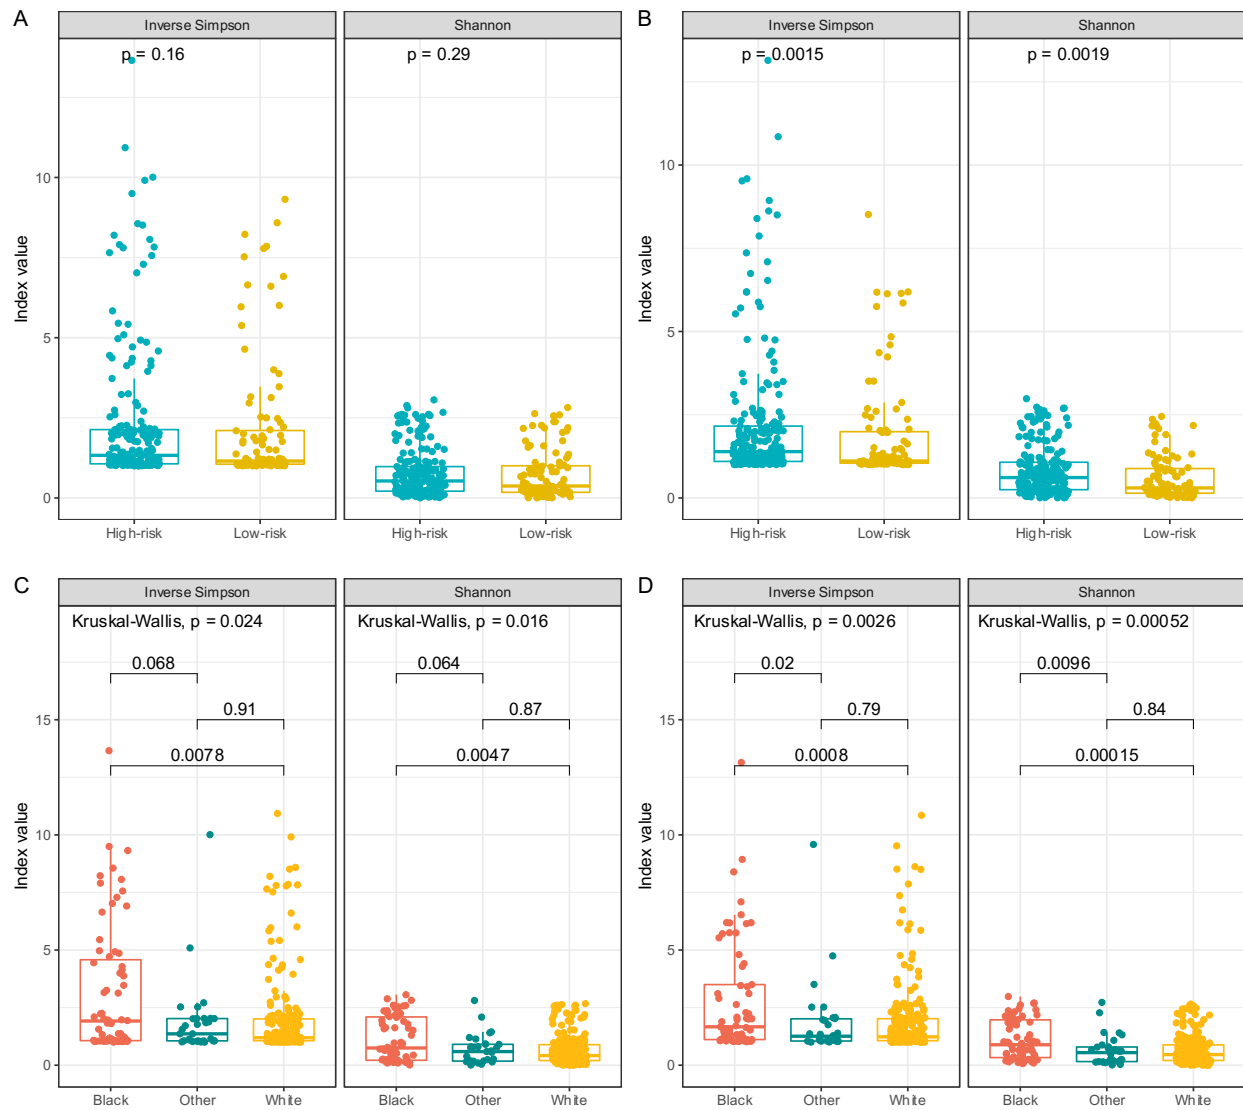

105  
 106 **Figure S9: Alpha diversity analyses at OTU level of species richness within cervicovaginal fluid.** Alpha  
 107 diversity significance based on Wilcoxon and Kruskal-Wallis calculated on Inverse Simpson and Shannon  
 108 indexes. (A, C) Early cervicovaginal fluid samples (10-15<sup>+6</sup> weeks gestation); (B, D) late samples (16-24<sup>+6</sup>  
 109 weeks gestation). Analyses based (A-B) on participant pregnancy risk status at study entry, (C-D) on  
 110 ethnicity. Horizontal line and boxes represent median and interquartile range.



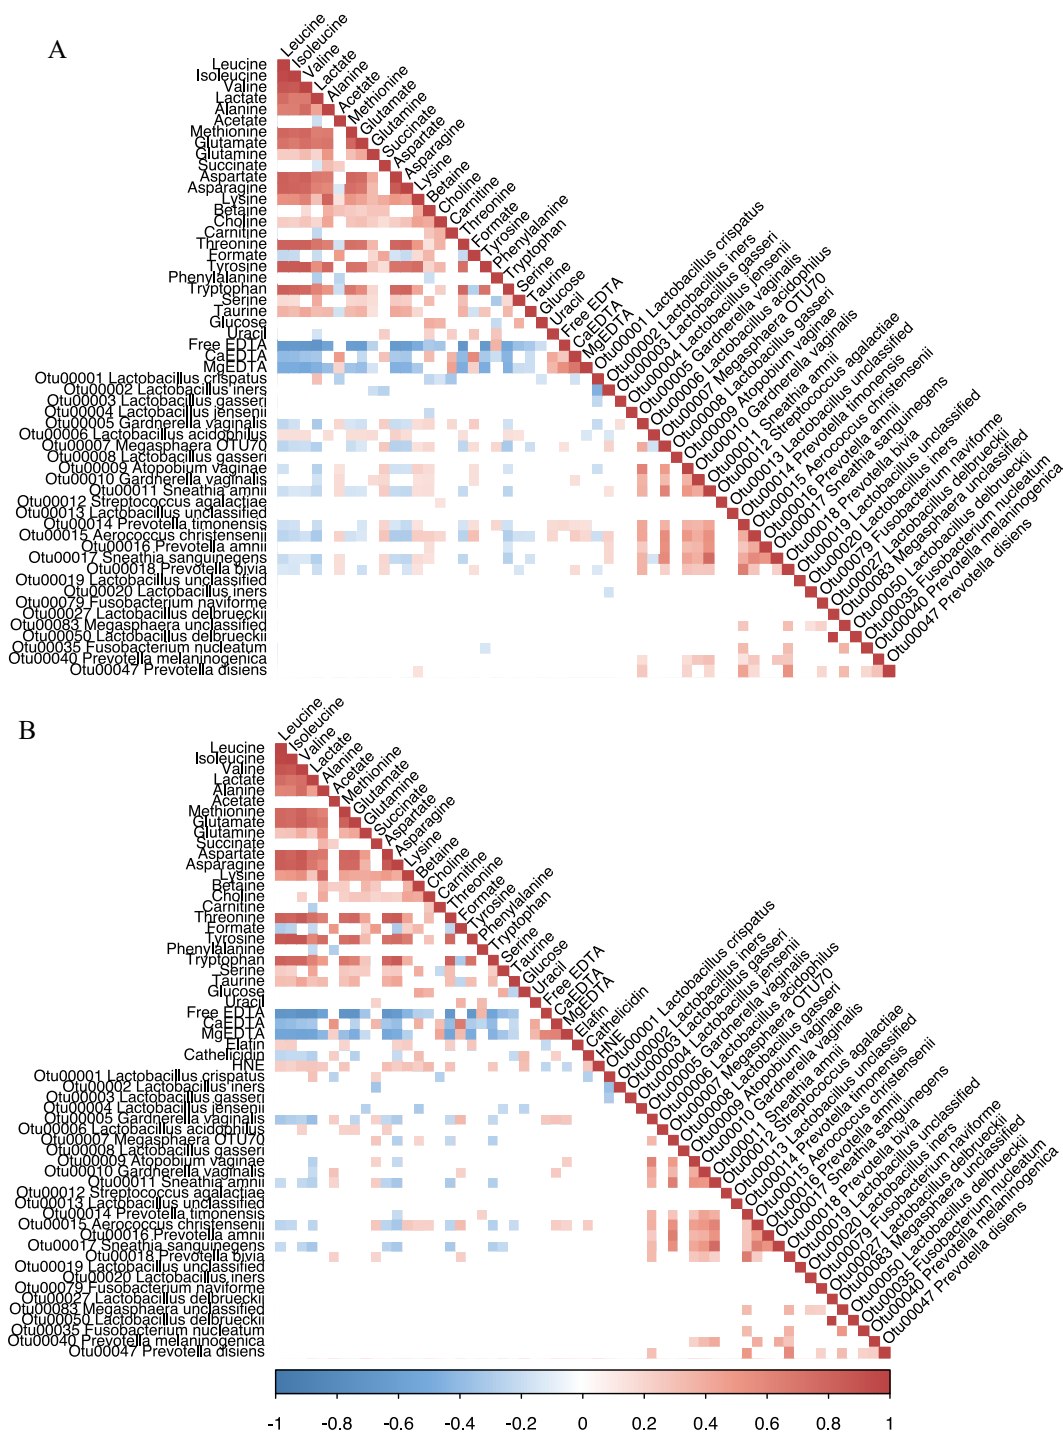

117

118

119

120

121

122

123

124

**Figure S11: Spearman Correlation analyses of cervicovaginal fluid OTUs, metabolites and host response proteins in late samples (16-23+6 weeks gestation).** (A) OTUs and metabolites (N= 305); (B) OTUs, metabolites, elafin, cathelicidin and HNE (N=154). OTUs are selected as most abundant i.e. filtered out OTUs with less than 1% average abundance and identified via LEfSe analyses for spontaneous preterm birth (sPTB <37 weeks). Only correlations (blue (negative) and red (positive)) with adjusted p values <0.05 are shown

A

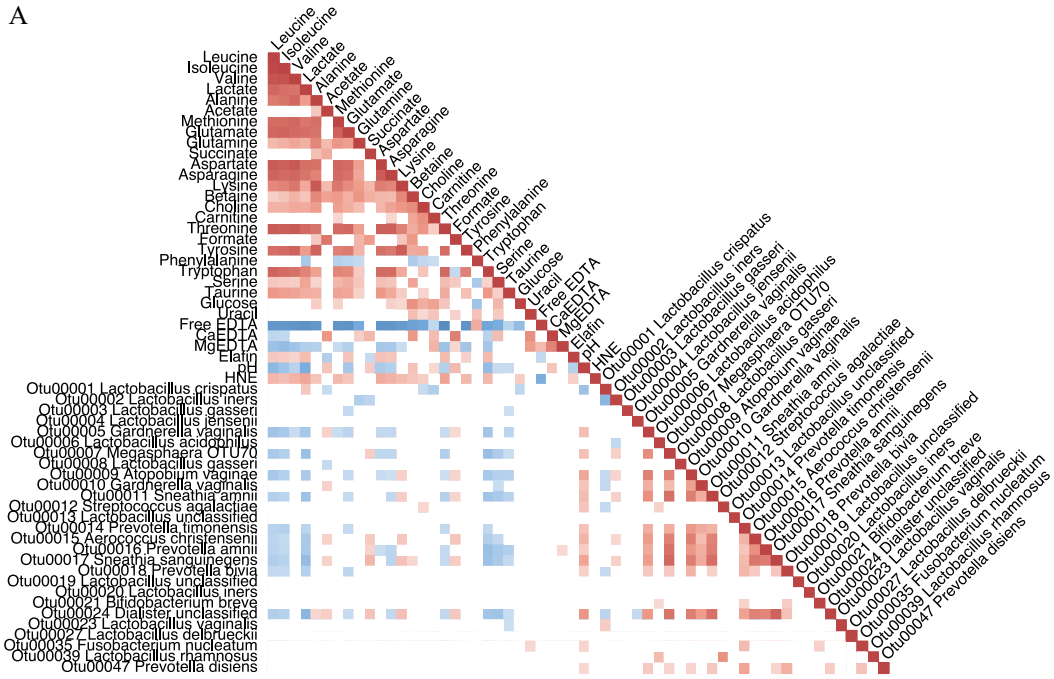

125

B

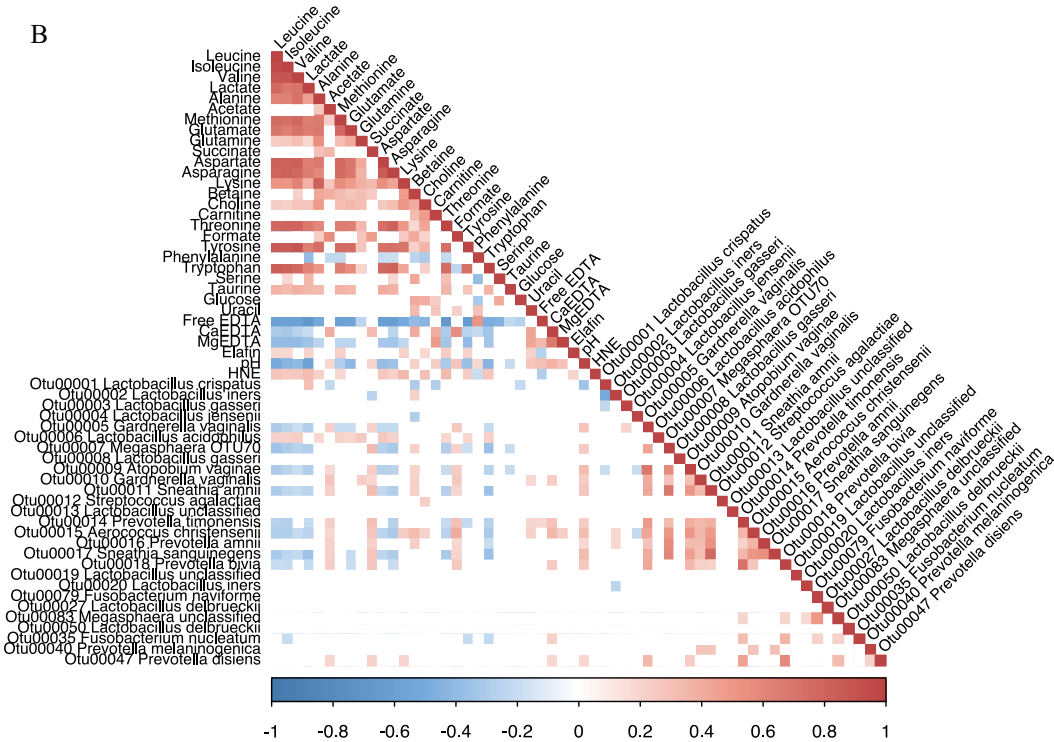

126

127

128

129

130

131

132

**Figure S12: Spearman Correlation analyses of cervicovaginal fluid from whole cohort to include pH. (A)** OTUs, metabolites, human neutrophil elastase (HNE), pH and elafin (N=164) in early samples, and in late samples (B) (N=164). OTUs selected as follows: i) showing more than 1% average abundance ii) identified via LfSe analyses as associated to spontaneous preterm birth (sPTB <37 weeks). Only correlation (blue (negative) and red (positive)) with adjusted p values <0.05 are shown.

133 **Table S1: Participant demographics.** Characteristics of participants providing samples in at least one time  
 134 point (either early or late gestation) for microbiome, metabolite and host defense protein/peptide  
 135 analysis. IUD pregnancies were removed; sPTB includes preterm prelabor rupture of membranes (PPROM,  
 136 n=29) and mid-trimester loss (n=11). sPTB37: spontaneous preterm birth <37 weeks' gestation; sPTB34:  
 137 spontaneous preterm birth <34 weeks' gestation.

| Characteristic                                    | Subcategory                  | Term                  | sPTB37(sPTB34)             | Total Women           |
|---------------------------------------------------|------------------------------|-----------------------|----------------------------|-----------------------|
| Count N (%)                                       |                              | 286<br>(82.7%)        | 60 (27 sPTB34)<br>(17.3%)  | 346                   |
| Maternal age (Years ± SD) at booking              |                              | 32.4±4.8              | 33.6±6.2                   | 32.6±5.1              |
| Body Mass Index<br>kg/m <sup>2</sup> ) at booking |                              | 25.5±5.5<br>(N=285)   | 27.0±4.9<br>(N=60)         | 25.7±5.5<br>(N=345)   |
|                                                   | White                        | 24.43±4.53<br>(N=204) | 24.87±3.96<br>(N=31)       | 24.49±4.45<br>(N=235) |
|                                                   | Black                        | 29.33±6.91<br>(N= 57) | 29.57±5.01<br>(N=18)       | 29.38±6.49<br>(N= 75) |
|                                                   | Other<br>(Asian and unknown) | 25.77±6.66<br>(N=24)  | 27.84±3.97<br>(N=11)       | 26.42±5.97<br>(N= 35) |
| Ethnicity N (%)                                   | White                        | 205<br>(86.9%)        | 31 (11 sPTB34)<br>(13.1%)  | 236<br>(100%)         |
|                                                   | Black                        | 57<br>(76.0%)         | 18 (10 sPTB34)<br>(24.0%)  | 75<br>(100%)          |
|                                                   | Other<br>(Asian and unknown) | 24<br>(68.6%)         | 11 (6 sPTB34)<br>(31.4%)   | 35<br>(100%)          |
| Risk status N (%)                                 | Low risk                     | 102<br>(96.23%)       | 4 (0 sPTB34)<br>(3.77%)    | 106                   |
|                                                   | Low risk White               | 80<br>(100%)          | 0<br>(0%)                  | 80<br>(100%)          |
|                                                   | Low risk Black               | 13<br>(81.2%)         | 3<br>(18.8%)               | 16<br>(100%)          |
|                                                   | Low risk other               | 9<br>(90%)            | 1<br>(10%)                 | 10<br>(100%)          |
|                                                   | High risk                    | 184<br>(76.67%)       | 56 (27 sPTB34)<br>(23.33%) | 240                   |
|                                                   | High risk White              | 125<br>(80.1%)        | 31<br>(19.9%)              | 156<br>(100%)         |
|                                                   | High risk Black              | 44<br>(74.6%)         | 15<br>(25.4%)              | 59<br>(100%)          |
|                                                   | High risk other              | 15<br>(60%)           | 10<br>(40%)                | 25<br>(100%)          |

|                                                              |                                          |     |                |     |
|--------------------------------------------------------------|------------------------------------------|-----|----------------|-----|
| Smoking status N                                             | Current smoker                           | 17  | 2              | 19  |
|                                                              | White                                    | 14  |                | 115 |
|                                                              | Black                                    | 2   |                | 02  |
|                                                              | Other                                    | 1   |                | 12  |
|                                                              | Ex-smoker (gave up in current pregnancy) | 17  | 3              | 20  |
|                                                              | White                                    | 13  | 3              | 16  |
|                                                              | Black                                    | 4   | 1              | 5   |
|                                                              | Other                                    | 0   | 0              | 0   |
|                                                              | Ex (gave up before current pregnancy)    | 40  | 9              | 49  |
|                                                              | White                                    | 31  | 8              | 39  |
|                                                              | Black                                    | 5   | 0              | 5   |
|                                                              | Other                                    | 0   | 0              | 0   |
|                                                              | Never smoked                             | 211 | 44             | 255 |
|                                                              | White                                    | 146 | 19             |     |
|                                                              | Black                                    | 46  | 16             |     |
| Other                                                        | 19                                       | 9   |                |     |
| Missing data                                                 | 1                                        | 2   | 3              |     |
| Short cervix <25 mm before 24 weeks gestation (N)            | High risk                                | 25  | 24 (18 sPTB34) | 49  |
| High-risk with short cervix <25 mm before 24 weeks gestation | Black                                    | 16  | 10 (8 sPTB34)  | 26  |
|                                                              | White                                    | 9   | 9 (6 sPTB34)   | 18  |
|                                                              | Other                                    | 5   | 5 (4 sPTB34)   | 10  |

138  
139

140 **Table S2: Exploration of cervicovaginal fluid (CVF) components.** Comparison of principal component  
 141 analyses (PCoA) groups in the early samples (10-15<sup>+6</sup> weeks gestation) with cervicovaginal fluid  
 142 metabolites (whole cohort) and host defense molecules. Significant differences (Wilcoxon p-value <0.05)  
 143 indicated by green (lower) or orange (higher) in A or B versus other PCoA groups.

| PCoA group                    | A v B | A v C | A v D | A v E | B v C | B v D | C v D |
|-------------------------------|-------|-------|-------|-------|-------|-------|-------|
| <b>CVF metabolites</b>        |       |       |       |       |       |       |       |
| Acetate                       |       |       |       |       |       |       |       |
| Alanine                       |       |       |       |       |       |       |       |
| Asparagine                    |       |       |       |       |       |       |       |
| Aspartate                     |       |       |       |       |       |       |       |
| Betaine                       |       |       |       |       |       |       |       |
| Ca EDTA                       |       |       |       |       |       |       |       |
| Carnitine                     |       |       |       |       |       |       |       |
| Choline                       |       |       |       |       |       |       |       |
| Formate                       |       |       |       |       |       |       |       |
| Glucose                       |       |       |       |       |       |       |       |
| Glutamate                     |       |       |       |       |       |       |       |
| Glutamine                     |       |       |       |       |       |       |       |
| Isoleucine                    |       |       |       |       |       |       |       |
| Lactate                       |       |       |       |       |       |       |       |
| Leucine                       |       |       |       |       |       |       |       |
| Lysine                        |       |       |       |       |       |       |       |
| Methionine                    |       |       |       |       |       |       |       |
| Mg EDTA                       |       |       |       |       |       |       |       |
| Phenylalanine                 |       |       |       |       |       |       |       |
| Serine                        |       |       |       |       |       |       |       |
| Succinate                     |       |       |       |       |       |       |       |
| Taurine                       |       |       |       |       |       |       |       |
| Threonine                     |       |       |       |       |       |       |       |
| Tryptophan                    |       |       |       |       |       |       |       |
| Tyrosine                      |       |       |       |       |       |       |       |
| Uracil                        |       |       |       |       |       |       |       |
| Valine                        |       |       |       |       |       |       |       |
| <b>Other CVF measurements</b> |       |       |       |       |       |       |       |
| pH                            |       |       |       |       |       |       |       |
| Elafin                        |       |       |       |       |       |       |       |
| Cathelicidin                  |       |       |       |       |       |       |       |
| HNE                           |       |       |       |       |       |       |       |

144 Number of samples per PCoA group for comparisons between i. metabolites: A = 89, B = 31, C = 115, D =  
 145 64, E = 6; ii. pH: A = 55, B=19, C=62, D=39, E=4; iii. Elafin: A= 85, B=29, C=111, D=61, E=6; iv. cathelicidin  
 146 measurements: A= 41, B=16, C=76, D=37, E=4; and v. human neutrophil elastase (HNE): A= 84, B=29,  
 147 C=107, D=57, E=6. One further metabolite was detected in CVF but removed from our analyses as  
 148 propylene glycol was a contaminant from the lubricant used for cervical length measurement in high risk  
 149 women.

150 **Table S3: Orthogonal Projections to Latent Structures – Discriminant Analysis (OPLS-DA) of**  
 151 **cervicovaginal fluid metabolites differences.** R<sup>2</sup>X and R<sup>2</sup>Y: explained variation, goodness of fit for X/OTU.  
 152 Q<sup>2</sup>X: goodness of prediction, explain the predicted variation. RMSEE: Root Mean Squared Error of  
 153 Estimation. pR<sup>2</sup>Y and pQ<sup>2</sup>: permuted R<sup>2</sup>Y and Q<sup>2</sup>Y; these values provide a baseline for Q2 above which a  
 154 model can discriminate according to the indicated binary classification.  
 155

| Comparison                                                                         | R <sup>2</sup> X<br>(cum) | R <sup>2</sup> Y<br>(cum) | Q <sup>2</sup><br>(cum) | RMSEE | pR <sup>2</sup> Y | pQ <sup>2</sup> |
|------------------------------------------------------------------------------------|---------------------------|---------------------------|-------------------------|-------|-------------------|-----------------|
| Ethnicity: White women and Black women early samples                               | 0.445                     | 0.174                     | 0.112                   | 0.394 | 0.05              | 0.05            |
| Ethnicity: White women and Black women late samples                                | 0.468                     | 0.168                     | 0.123                   | 0.391 | 0.05              | 0.05            |
| Risk: Low-risk and High-risk women in late samples<br>(White and Black women only) | 0.396                     | 0.134                     | 0.044                   | 0.437 | 0.05              | 0.05            |

156  
 157  
 158

159 **Table S4: LDA (Linear Discriminant Analysis) Effect Size (LEfSe) of cervicovaginal fluid OTUs in relation**  
 160 **to term and preterm (<37 weeks) birth.** Analyses for cervicovaginal fluid samples collected during early  
 161 (10-15<sup>+6</sup> weeks) and late (16-23<sup>+6</sup> weeks) pregnancy. Associations between OTUs and term delivery or  
 162 sPTB <37 weeks (sPTB37) in the whole cohort and stratified by ethnicity assessed by LEfSe. All data have  
 163 an LDA score > 3 and p-value < 0.05. Table show OTUs with relative abundance overall >0.5% across all  
 164 samples, in bold OTUs >1% abundance.  
 165

| Sampling time   | Direction | OTU and species / taxon identification    | LDA   | p-value |
|-----------------|-----------|-------------------------------------------|-------|---------|
| All women       |           |                                           |       |         |
| Early Pregnancy | Term      | <b>OTU1 <i>L. crispatus</i></b>           | 4.959 | 0.005   |
|                 |           | <b>OTU6 <i>L. acidophilus</i></b>         | 3.848 | 0.021   |
|                 | sPTB37    | OTU27 <i>L. delbrueckii</i>               | 3.720 | 0.001   |
|                 |           | <b>OTU3 <i>L. gasseri</i></b>             | 4.525 | 0.021   |
|                 |           | <b>OTU21 <i>Bifidobacterium breve</i></b> | 4.024 | 0.009   |
| Late Pregnancy  | Term      | <b>OTU1 <i>L. crispatus</i></b>           | 5.032 | 0.000   |
|                 |           | OTU27 <i>L. delbrueckii</i>               | 3.588 | 0.022   |
|                 | sPTB37    | OTU18 <i>Prevotella bivia</i>             | 3.365 | 0.001   |
|                 |           | OTU35 <i>Fusobacterium nucleatum</i>      | 3.710 | 0.001   |
|                 |           | OTU47 <i>Prevotella disiens</i>           | 3.099 | 0.014   |
| White women     |           |                                           |       |         |
| Early Pregnancy | Term      | <b>OTU1 <i>L. crispatus</i></b>           | 4.982 | 0.006   |
|                 | sPTB37    | OTU27 <i>L. delbrueckii</i>               | 3.973 | 0.005   |
|                 |           | <b>OTU3 <i>L. gasseri</i></b>             | 4.818 | 0.014   |
| Late Pregnancy  | Term      | <b>OTU1 <i>L. crispatus</i></b>           | 5.078 | 0.000   |
|                 | sPTB37    | OTU27 <i>L. delbrueckii</i>               | 4.037 | 0.009   |
|                 |           | OTU18 <i>Prevotella bivia</i>             | 3.452 | 0.030   |
|                 |           | OTU39 <i>L. rhamnosus</i>                 | 3.228 | 0.030   |
|                 |           | OTU26 <i>Dialister micraerophilus</i>     | 3.221 | 0.001   |
|                 |           | OTU47 <i>Prevotella disiens</i>           | 3.159 | 0.036   |
| Black women     |           |                                           |       |         |
| Early Pregnancy | sPTB37    | OTU23 <i>L. vaginalis</i>                 | 3.032 | 0.025   |
|                 |           | <b>OTU21 <i>Bifidobacterium breve</i></b> | 4.398 | 0.010   |
|                 |           | <b>OTU6 <i>L. acidophilus</i></b>         | 3.274 | 0.004   |
| Late Pregnancy  | Term      | <b>OTU3 <i>L. gasseri</i></b>             | 4.346 | 0.050   |
|                 | sPTB37    | OTU35 <i>Fusobacterium nucleatum</i>      | 3.791 | 0.023   |
|                 |           | OTU18 <i>Prevotella bivia</i>             | 3.522 | 0.010   |

166  
 167  
 168

169 **Table S5: LDA (Linear Discriminant Analysis) Effect Size (LEfSe) of cervicovaginal fluid OTUs in relation**  
 170 **to term and preterm (<34 weeks) birth.** Analyses for cervicovaginal fluid samples collected during early  
 171 (10-15<sup>+6</sup> weeks) and late (16-23<sup>+6</sup> weeks) pregnancy. LEfSe association at OTUs level in the whole cohort.  
 172 Cervicovaginal OTUs with bacterial taxonomy associated that significantly correlate with term or sPTB34  
 173 (spontaneous preterm birth less than 34 weeks' gestation) in all women, White or Black women only. All  
 174 data have an LDA score >3 and p-value <0.05. Table shows OTUs with relative abundance overall >0.5%  
 175 across all samples, in bold OTUs >1% abundance.

| Sampling time   | Direction | OTU and species / taxon identification       | LDA   | p-value  |
|-----------------|-----------|----------------------------------------------|-------|----------|
| All women       |           |                                              |       |          |
| Early Pregnancy | Term      | <b>OTU7 <i>Megasphaera</i> "OTU70"</b>       | 4.103 | 0.029    |
|                 |           | <b>OTU6 <i>Lactobacillus acidophilus</i></b> | 3.914 | 0.044    |
|                 |           | <b>OTU16 <i>Prevotella amnii</i></b>         | 3.474 | 0.042    |
|                 | sPTB34    | <b>OTU3 <i>Lactobacillus gasseri</i></b>     | 4.736 | 0.024    |
|                 |           | <b>OTU21 <i>Bifidobacterium breve</i></b>    | 4.323 | 0.043    |
|                 |           | OTU27 <i>Lactobacillus delbrueckii</i>       | 4.003 | 7.05E-07 |
| Late Pregnancy  | Term      | <b>OTU1 <i>Lactobacillus crispatus</i></b>   | 5.06  | 0.025    |
|                 | sPTB34    | <b>OTU14 <i>Prevotella timonensis</i></b>    | 4.1   | 0.006    |
|                 |           | OTU27 <i>Lactobacillus delbrueckii</i>       | 4.064 | 1.92E-04 |
|                 |           | OTU35 <i>Fusobacterium nucleatum</i>         | 4.042 | 2.45E-07 |
|                 |           | OTU18 <i>Prevotella bivia</i>                | 3.768 | 4.63E-06 |
|                 |           | OTU26 <i>Dialister micraerophilus</i>        | 3.291 | 1.70E-05 |
|                 |           | OTU24 <i>Dialister</i> unclassified          | 3.116 | 0.022    |
| White women     |           |                                              |       |          |
| Early Pregnancy | sPTB34    | <b>OTU3 <i>Lactobacillus gasseri</i></b>     | 5.05  | 0.0162   |
|                 |           | OTU27 <i>Lactobacillus delbrueckii</i>       | 4.579 | 6.12E-07 |
|                 |           | OTU39 <i>Lactobacillus rhamnosus</i>         | 3.101 | 0.0005   |
| Late Pregnancy  | Term      | <b>OTU1 <i>Lactobacillus crispatus</i></b>   | 5.205 | 0.0315   |
|                 | sPTB34    | OTU27 <i>Lactobacillus delbrueckii</i>       | 4.188 | 5.10E-06 |
|                 |           | OTU18 <i>Prevotella bivia</i>                | 3.823 | 0.0004   |
|                 |           | OTU26 <i>Dialister micraerophilus</i>        | 3.436 | 3.02E-06 |
|                 |           | OTU39 <i>Lactobacillus rhamnosus</i>         | 3.215 | 0.0046   |
| Black women     |           |                                              |       |          |
| Early Pregnancy | Term      | <b>OTU7 <i>Megasphaera</i> "OTU70"</b>       | 4.382 | 0.027    |
|                 | sPTB34    | <b>OTU21 <i>Bifidobacterium breve</i></b>    | 4.676 | 0.034    |
| Late Pregnancy  | Term      | <b>OTU12 <i>Streptococcus agalactiae</i></b> | 4.042 | 0.011    |
|                 | sPTB34    | OTU35 <i>Fusobacterium nucleatum</i>         | 4.292 | 2.97E-04 |
|                 |           | OTU18 <i>Prevotella bivia</i>                | 3.721 | 0.032    |
|                 |           | OTU45 <i>Mobiluncus mulieris</i>             | 3.33  | 0.008    |

176 **Table S6: Composite metabolite prediction model for spontaneous preterm birth <37 weeks.** Stepwise  
 177 logistic regression including ethnicity and cervicovaginal fluid metabolites (detected using NMR) in the  
 178 model, identified seven metabolites as a useful composite indicator of risk of spontaneous preterm birth  
 179 <37 weeks (sPTB37). Data from N = 618 CVF samples. Robust standard errors and hence confidence  
 180 interval and p-values, were adjusted for up to two measurements on each participant (n=341). Receiver  
 181 operator characteristic curves given for overall test; at two different gestational sampling points and  
 182 stratified for self-reported ethnicity. Odds ratios given for the contribution of individual metabolites to  
 183 the overall prediction. For the seven metabolites, the Odds Ratios show the impact of a 1 standard  
 184 deviation change in metabolite levels on chance of SPTB (standard deviations for leucine 0.538, tyrosine  
 185 0.202, lactate 5.62, betaine 0.209, acetate 1.88, Ca<sup>2+</sup> 2.26, aspartate 0.0279, glucose, 0.423).  
 186

| Composite metabolite prediction model   | ROC Area<br>(Confidence interval) |
|-----------------------------------------|-----------------------------------|
| sPTB37                                  | 0.752 (0.699 to 0.806)            |
| Test at 10-15 <sup>+6</sup> weeks       | 0.748 (0.671 to 0.824)            |
| Test at 16-23 <sup>+6</sup> weeks       | 0.763 (0.689 to 0.836)            |
| Composite metabolite model by ethnicity |                                   |
| Test (Black women)                      | 0.716 (0.607 to 0.826)            |
| Test (White women)                      | 0.750 (0.677 to 0.822)            |
| Test (Other)                            | 0.751 (0.622 to 0.881)            |
| Individual metabolites in composite     | Odds Ratios (Confidence Interval) |
| Leucine                                 | 3.118 (1.616 to 6.017)            |
| Tyrosine                                | 0.023 (0.002 to 0.251)            |
| Aspartate                               | 1.675 (1.035 to 2.712)            |
| Lactate                                 | 0.432 (0.277 to 0.675)            |
| Betaine                                 | 1.365 (1.029 to 1.812)            |
| Acetate                                 | 1.610 (1.220 to 2.124)            |
| Ca <sup>2+</sup>                        | 1.378 (1.003 to 1.894)            |

187  
 188  
 189  
 190  
 191  
 192  
 193  
 194

195 **Table S7: Logistic regression of significant cervicovaginal three metabolites (standardized) to predict**  
 196 **spontaneous preterm birth <34 weeks (sPTB34).** N=618 samples from 341 women. Robust standard  
 197 errors and hence confidence interval and p-values, were adjusted for up to two measurements per  
 198 participant. For Ca<sup>2+</sup>, aspartate and glucose, Odds Ratios show the impact of a 1 standard deviation change  
 199 in metabolite levels on chance of sPTB34 (standard deviations for Ca<sup>2+</sup> 2.26; aspartate 0.0279; glucose,  
 200 0.423).  
 201

| Composite prediction model                 | ROC Area   | Confidence Interval |
|--------------------------------------------|------------|---------------------|
| sPTB34                                     | 0.701      | 0.626 to 0.776      |
| Individual metabolites<br>(n=341; n=618)   | Odds Ratio | Confidence Interval |
| Glucose                                    | 1.269      | 1.129 to 1.426      |
| Ca <sup>2+</sup>                           | 1.86291    | 1.298 to 2.673      |
| Aspartate                                  | 1.767967   | 1.295 to 2.414      |
| In order rejected from the model at P<0.05 |            |                     |
| Free EDTA, methionine, betaine, acetate    |            |                     |

202  
 203  
 204  
 205  
 206  
 207  
 208  
 209  
 210  
 211  
 212  
 213

**Table S8: Stepwise logistic regression model of phylotypes.** Stepwise logistic regression including  
 ethnicity and the 9 most abundant cervicovaginal fluid OTUs (detected using 16s rRNA sequencing) in the  
 model, identified Black and Other ethnicities and the OTUs associated with *L. acidophilus* and *L. crispatus*  
 as being significantly associated with risk of spontaneous preterm birth <34 weeks. Data from N = 618 CVF  
 samples. Robust standard errors (not shown), and hence confidence interval and p-values, were adjusted  
 for up to two measurements on each participant (n=341). Odds Ratio of the bacteria show the impact of  
 a 1% change in the prevalence on chance of preterm birth

|                                                                                                                                 | Odds Ratio | Confidence interval |
|---------------------------------------------------------------------------------------------------------------------------------|------------|---------------------|
| <i>L. acidophilus</i>                                                                                                           | 0.008      | 0.001 to 0.115      |
| <i>L. crispatus</i>                                                                                                             | 0.233      | 0.059 to 0.921      |
| Black ethnicity                                                                                                                 | 2.489      | 0.915 to 6.77       |
| Other ethnicity                                                                                                                 | 4.374      | 1.402 to 13.642     |
| In order, rejected from model at P>0.05                                                                                         |            |                     |
| <i>S. amnii</i> , <i>A. vaginae</i> , <i>G. vaginalis</i> , <i>L. gasseri</i> , <i>L. jensenii</i> , <i>L. iners</i> , M. OTU70 |            |                     |

214  
 215  
 216

217 **Table S9: Logistic regression metabolites and phlotypes for spontaneous preterm birth <34 weeks**  
 218 **(sPTB34).** Logistic regression of significant cervicovaginal fluid metabolites (standardized), *L. crispatus* and  
 219 *L. acidophilus* phlotypes proportions to predict sPTB34. N=618 samples from 341 women. Robust  
 220 standard errors and hence confidence interval and p-values, were adjusted for up to two measurements  
 221 per participant. For Ca<sup>2+</sup>, aspartate and glucose, Odds Ratios show the impact of a 1 standard deviation  
 222 change in metabolite levels on chance of sPTB (standard deviations for Ca<sup>2+</sup> 2.26; aspartate 0.0279;  
 223 glucose, 0.423). For *L. crispatus* and *L. acidophilus* Odds Ratios show the impact of a 1% change in  
 224 prevalence.

225

| Composite prediction model                            | ROC Area    | Confidence Interval |
|-------------------------------------------------------|-------------|---------------------|
| sPTB34                                                | 0.758       | 0.692 to 0.823      |
| Test at 10-15 <sup>+6</sup> weeks                     | 0.755       | 0.655 to 0.855      |
| Test at 16-23 <sup>+6</sup> weeks                     | 0.758       | 0.676 to 0.840      |
| Composite metabolite prediction by ethnicity          |             |                     |
| Test (black women)                                    | 0.594       | 0.452 to 0.735      |
| Test (white women)                                    | 0.835       | 0.765 to 0.906      |
| Test (Other)                                          | 0.716       | 0.541 to 0.891      |
| Individual metabolites in composite<br>(n=341; n=618) | Odds Ratios | Confidence Interval |
| <i>L. crispatus</i>                                   | 0.986       | 0.973 to 0.999      |
| Ca <sup>2+</sup>                                      | 1.712       | 1.150 to 1.548      |
| Aspartate                                             | 1.883       | 1.314 to 2.697      |
| <i>L. acidophilus</i>                                 | 0.943       | 0.921 to 0.967      |
| Glucose                                               | 1.230       | 1.085 to 1.395      |

226

227

228

229 **Table S10: Characterization of the 16S microbiome based on species-level composition by**  
 230 **samples.** Sequences were assigned to the vaginal database taxonomy by means of the Wang  
 231 approach.

232

233

234

235
